# Supplementary material for: High-intensity first near-infrared emission through energy migration in multilayered upconversion nanoparticles
Source: Royal Society of Chemistry journal article supplement (doi:10.1039/d3cp01440a), 2023-01-01
Supplement: d3cp01440a1.pdf [file d3cp01440a1.pdf]

# Supporting Information

## High-intensity first near-infrared emission through energy migration in multilayered upconversion nanoparticles

Xuegang Zheng <sup>a,b</sup>, Ying Chen <sup>a,b</sup>, Meijuan Liu <sup>a,b</sup>, Shusheng Pan <sup>a,b</sup>, Zhiyu Liu <sup>a,b</sup>, Dekang Xu <sup>c</sup>,  
Hao Lin <sup>a,b,\*</sup>

<sup>a</sup> School of Physics and Materials Science, Guangzhou University, Guangzhou 510006, P. R. China

<sup>b</sup> Research Center for Advanced Information Materials, Huangpu Research & Graduate School of Guangzhou University, Guangzhou 510555, P. R. China

<sup>c</sup> School of Chemistry and Materials Engineering, Huizhou University, Huizhou 516007, P. R. China

\*Corresponding Author

Dr. Hao Lin

E-mail: [linhao@gzhu.edu.cn](mailto:linhao@gzhu.edu.cn)

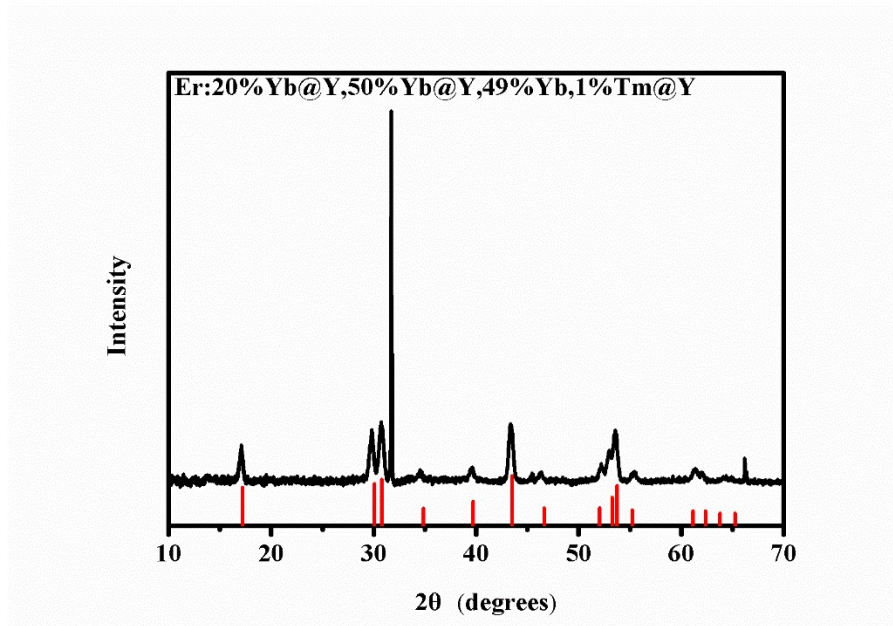

**Fig. S1.** XRD patterns of NaErF<sub>4</sub>:20%Yb@NaYF<sub>4</sub>:50%Yb@NaYF<sub>4</sub>:49%Yb,1%Tm@NaYF<sub>4</sub> UCNPs, and the vertical red lines are the standard diffraction patterns of β-NaYF<sub>4</sub> (JCPDS 16-0334).

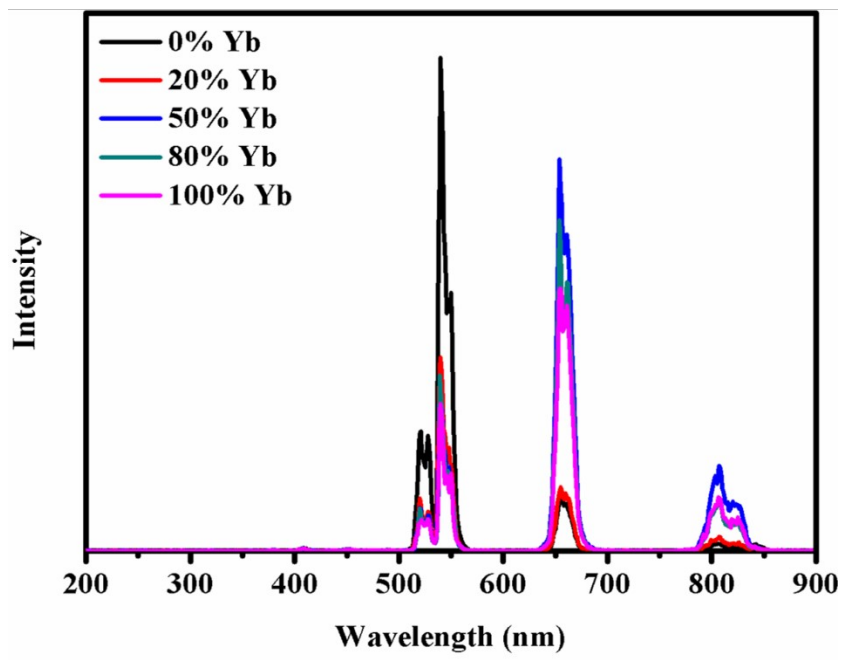

**Fig. S2.** UC luminescence spectra of NaErF<sub>4</sub>:20%Yb@NaYF<sub>4</sub>:x%Yb@NaYF<sub>4</sub>:49%Yb,1%Tm@NaYF<sub>4</sub> ( $x = 0, 20, 50, 80, 100$ ) UCNPs under 980 nm excitation.

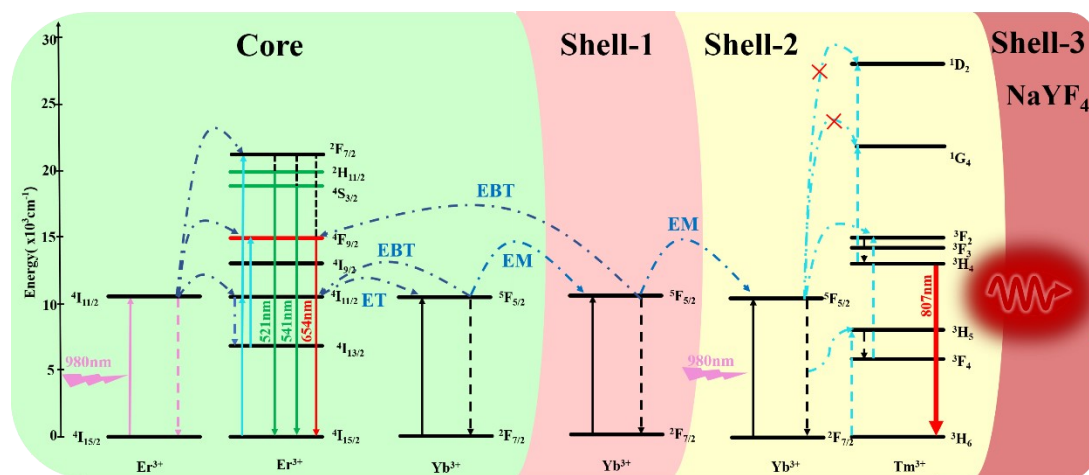

**Fig. S3.** Schematic energy-level diagram and the proposed energy transfer mechanisms of the NaErF<sub>4</sub>:Yb@NaYF<sub>4</sub>:Yb@NaYF<sub>4</sub>:Yb,Tm@NaYF<sub>4</sub> core/shell/shell/shell UCNPs under 980 nm excitation.

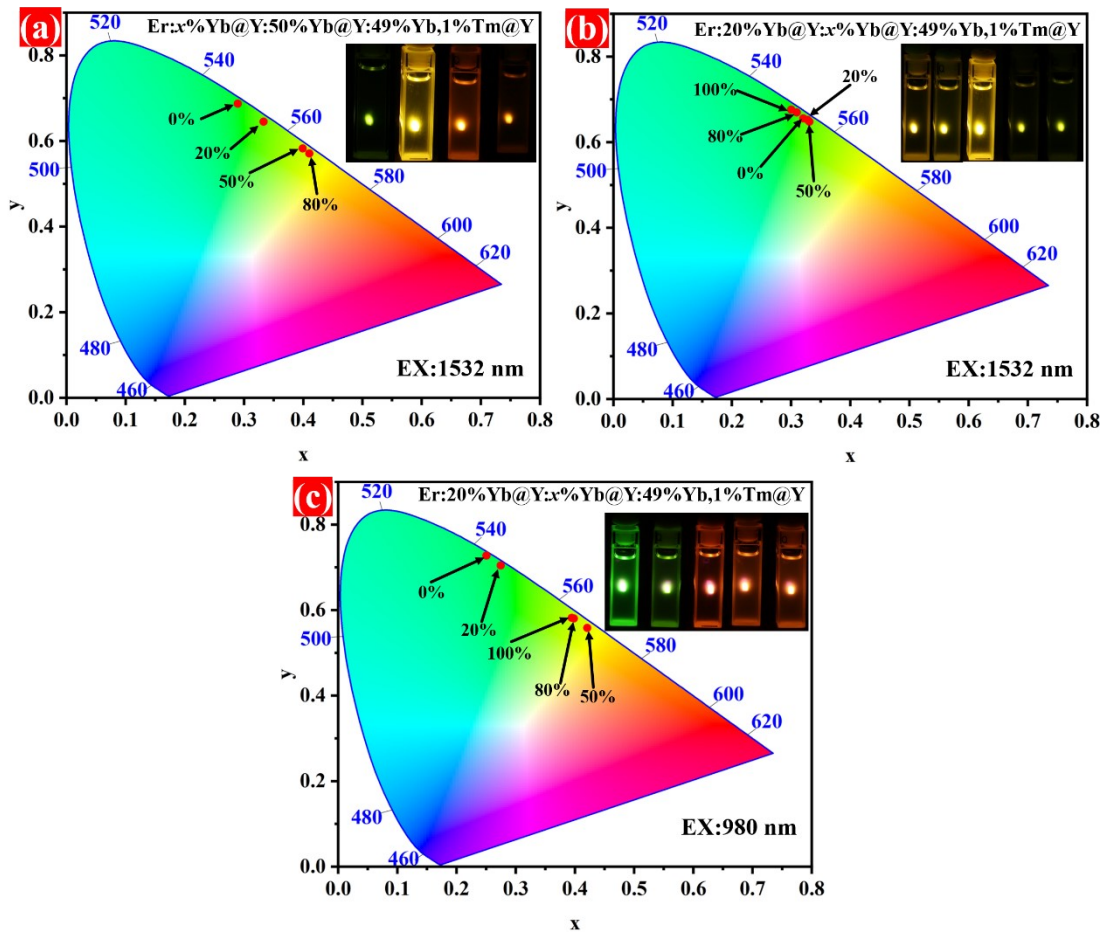

**Fig. S4.** The CIE diagram and corresponding emission photographs of NaErF<sub>4</sub>:x%Yb@NaYF<sub>4</sub>:50%Yb@NaYF<sub>4</sub>:49%Yb,1%Tm@NaYF<sub>4</sub> (x = 0, 20, 50, 80) and NaErF<sub>4</sub>:20%Yb@NaYF<sub>4</sub>:x%Yb@NaYF<sub>4</sub>:49%Yb,1%Tm@NaYF<sub>4</sub> (x = 0, 20, 50, 80, 100) UCNPs under (a-b) 1532 nm and (c) 980 nm excitations.

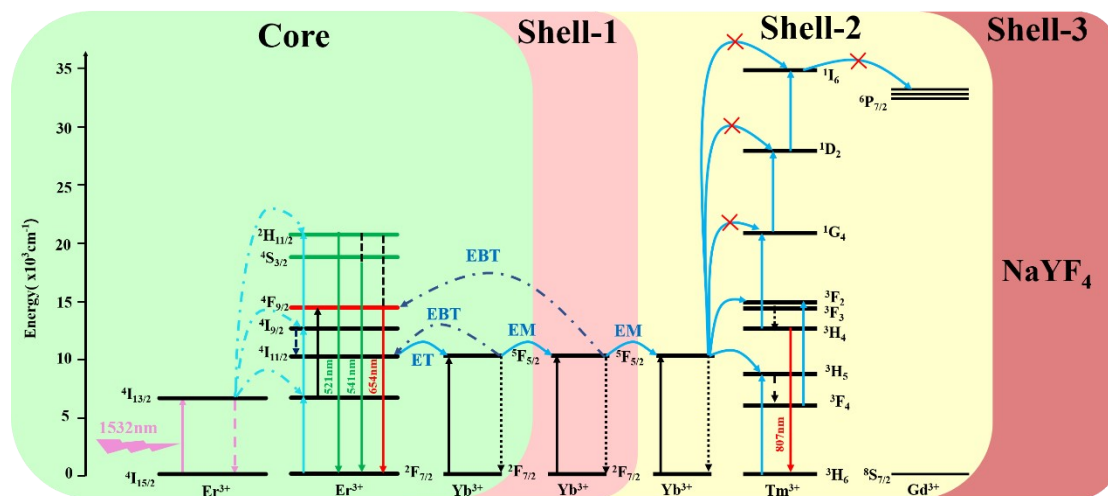

**Fig. S5.** Schematic energy-level diagram and the proposed energy transfer mechanisms of the NaErF<sub>4</sub>:Yb@NaYF<sub>4</sub>:Yb@NaGdF<sub>4</sub>:Yb,Tm@NaYF<sub>4</sub> core/shell/shell/shell UCNPs under 1532 nm excitation.

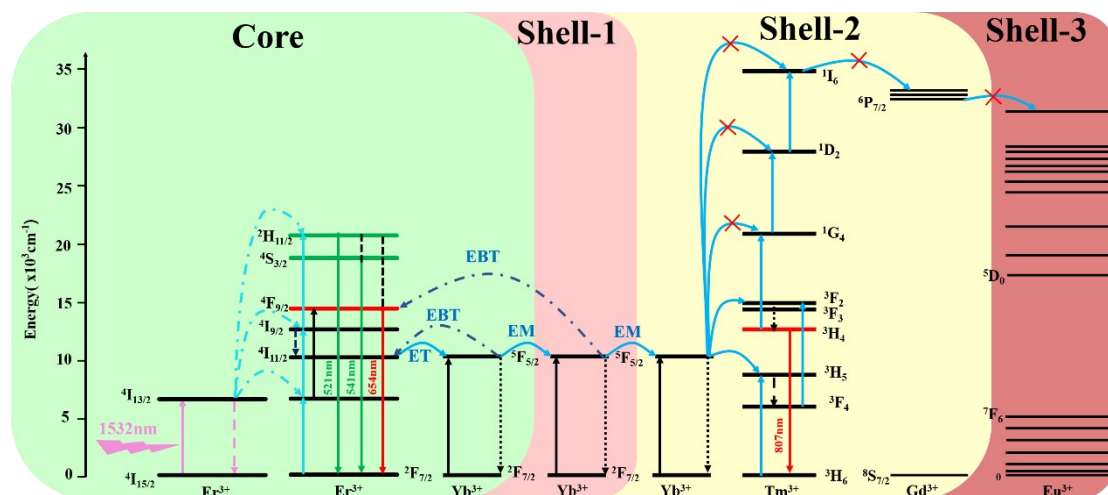

Fig. S6. Schematic energy-level diagram and the proposed energy transfer mechanisms of the NaErF<sub>4</sub>:Yb@NaYF<sub>4</sub>:Yb@NaGdF<sub>4</sub>:Yb,Tm@NaYF<sub>4</sub>:Eu core-shell-shell-shell UCNPs under 1532 nm excitation.

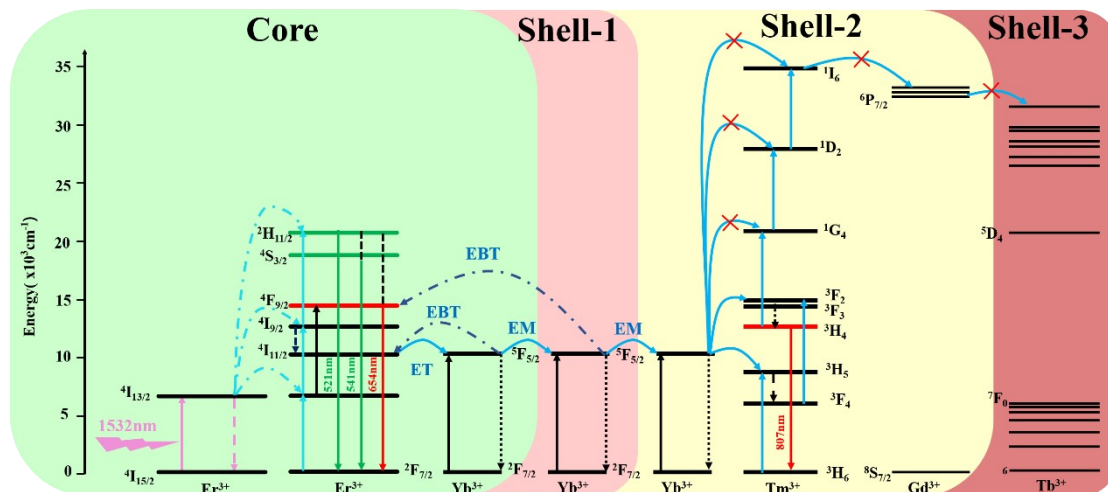

Fig. S7. Schematic energy-level diagram and the proposed energy transfer mechanisms of the NaErF<sub>4</sub>:Yb@NaYF<sub>4</sub>:Yb@NaGdF<sub>4</sub>:Yb,Tm@NaYF<sub>4</sub>:Tb core-shell-shell-shell UCNPs under 1532 nm excitation.



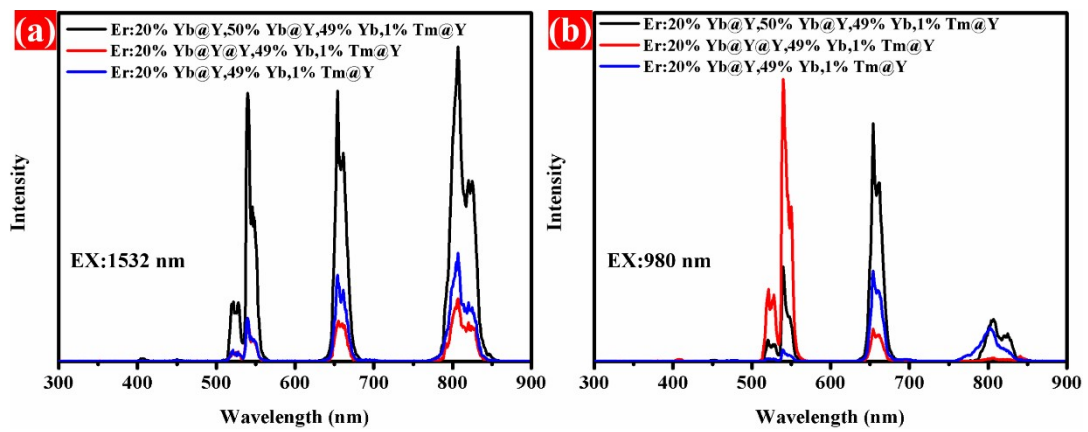

**Fig. S8.** UC luminescence spectra of NaErF<sub>4</sub>:20%Yb@NaYF<sub>4</sub>:50%Yb@NaYF<sub>4</sub>:49%Yb,1%Tm@NaYF<sub>4</sub>, NaErF<sub>4</sub>:20%Yb@NaYF<sub>4</sub>:49%Yb,1%Tm@NaYF<sub>4</sub> and NaErF<sub>4</sub>:20%Yb@NaYF<sub>4</sub>:49%Yb,1%Tm@NaYF<sub>4</sub> UCNPs under (a) 1532 nm and (b) 980 nm excitations.

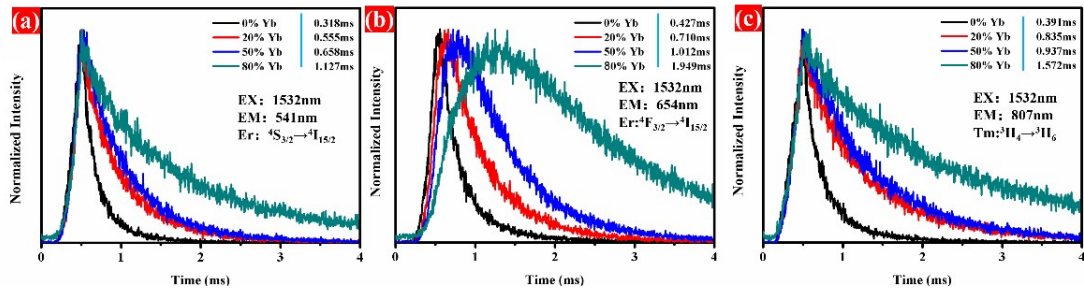

**Fig. S9.** Decay curves of (a) Er<sup>3+</sup>:<sup>4</sup>S<sub>3/2</sub>→<sup>4</sup>I<sub>15/2</sub> (541 nm), (b) Er<sup>3+</sup>:<sup>4</sup>F<sub>9/2</sub>→<sup>4</sup>I<sub>15/2</sub> (654 nm) and (c) Tm<sup>3+</sup>:<sup>3</sup>H<sub>4</sub>→<sup>3</sup>H<sub>6</sub> (807 nm) emissions in NaErF<sub>4</sub>:x%Yb@NaYF<sub>4</sub>:50%Yb@NaYF<sub>4</sub>:49%Yb,1%Tm@NaYF<sub>4</sub> (x = 0, 20, 50, 80) UCNPs under 1532 nm excitation, respectively.
